# Supplementary material
Source: PubMed Central journal article supplement (PMC2818903)
Supplement: 0907549107_pnas.0907549107_SI.pdf [file 0907549107_pnas.0907549107_SI.pdf]

# Supporting Information

Lionetti et al. 10.1073/pnas.0907549107

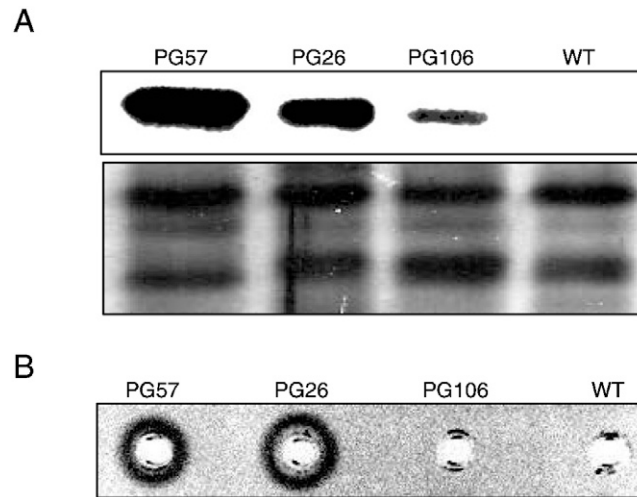

**Fig. S1.** Expression of polygalacturonase (PG) in independent Arabidopsis transgenic lines. (A) Equal amounts of total leaf proteins (2  $\mu$ g) of WT and transgenic PG57, PG26, and PG106 Arabidopsis lines were separated by SDS-PAGE and transferred to a nitrocellulose membrane. The blot was hybridized with a polyclonal antibody against pgall (Top). Silver nitrate staining was employed to confirm equal loading (detail, Bottom). (B) PG activity in Arabidopsis leaf total proteins (2  $\mu$ g) of each line was determined by agar diffusion assay. The appearance of an opaque halo around the wells indicates polygalacturonate degradation.

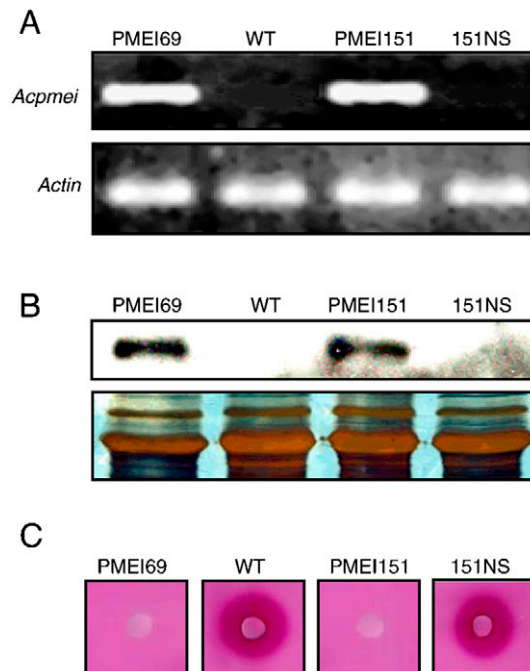

**Fig. S2.** Expression of pectin methylesterase (PME) in independent wheat transgenic lines. (A) AcPMEI expression in leaves of WT and transgenic PME169 and PME151 and null segregant plants of AcPMEI151 (151NS) plants, as determined by RT-PCR followed by agarose gel electrophoresis. Actin (*Act*) expression was used as a control. (B) Immunoblot analysis of equal amounts of total proteins (2  $\mu$ g) extracted from leaves of WT and transgenic plants, by using a monoclonal antibody against AcPMEI (Top). Silver nitrate staining was employed to confirm equal loading (detail, Bottom). (C) Agarose diffusion assay for PME activity in equal amounts of total proteins (2  $\mu$ g) from leaves of WT and transgenic plants. The absence of the halo indicates the lack of PME activity.
